# Supplementary material for: Multipurpose Prevention Technologies: Oral, Parenteral, and Vaginal Dosage Forms for Prevention of HIV/STIs and Unplanned Pregnancy
Source: MDPI journal article supplement (doi:10.3390/polym13152450), 2021-07-26
Supplement: s1 [file s1]

Supplementary Materials.

**Table S1.** MPTs in preclinical development.

| Product Name/Developer                     | Indication                 | Delivery Platform          | Development Stage      | Active Pharmaceutical Ingredients                                              | Duration of Action | Reference |
|--------------------------------------------|----------------------------|----------------------------|------------------------|--------------------------------------------------------------------------------|--------------------|-----------|
| International Partnership for Microbicides | HIV, HSV-2, Pregnancy      | Vaginal tablet             | -                      | Dapivirine, levonorgestrel, acyclovir                                          | 8 hours            | [1]       |
| Population Council                         | HIV, HSV-2, HPV, Pregnancy | Intravaginal ring          | Preclinical – Early    | Levonorgestrel, carrageenan, MIV-150, zinc acetate                             | 28 days            | [2,3]     |
|                                            | HIV, HSV-2, HPV            | Vaginal insert             | Preclinical - Early    | Griffithsin carrageenan                                                        | 8 hours            | [4]       |
| Population Council/Oak Crest Institute     | HIV, Pregnancy             | Intravaginal ring (POD)    | Preclinical - Early    | Q-Griffithsin, etonogestrel, ethinyl estradiol                                 | 90 days            | [5]       |
| Oak Crest Institute of Science             | HIV, HSV-2                 | Intravaginal ring (POD)    | Preclinical - Advanced | Acyclovir, tenofovir                                                           | 28 days            | [6]       |
| CONRAD Program                             | HIV, Pregnancy             | Copper Intrauterine system | Preclinical - Advanced | Elvitegravir                                                                   | 1 year             | -         |
| Research Triangle Institute (RTI)          | HIV, Pregnancy             | Implant                    | Preclinical - Early    | Tenofovir, levonorgestrel, etonogestrel                                        | 7 months           | [7,8]     |
| Merck                                      | HIV, pregnancy             | Implant                    | -                      | Islatravir, etonogestrel                                                       | ≥ 1 year           | [9]       |
| PATH/Queen's University at Belfast         | HIV, Pregnancy             | Microarray Patch           | Preclinical - Early    | Cabotegravir, progestin                                                        | 7 days             | [10]      |
| Oak Crest Institute of Science             | HIV, HSV-2, Pregnancy      | Intravaginal Ring (POD)    | Preclinical - Advanced | Tenofovir alafenamide hemifumarate, acyclovir, ethinyl estradiol, etonogestrel | 35 days            | [11]      |
| SRI International                          | HIV, HSV-2                 | Vaginal gel                | Preclinical – Early    | Tenofovir, acyclovir                                                           | 24 hours           | [12]      |

## References

- McConville, C.; Major, I.; Devlin, B.; Brimer, A. Development of a multi-layered vaginal tablet containing dapivirine, levonorgestrel and acyclovir for use as a multipurpose prevention technology. *Eur. J. Pharm. Biopharm.* **2016**, *104*, 171–179, doi:10.1016/j.ejpb.2016.05.003.
- Derby, N.; Aravantinou, M.; Kenney, J.; Ugaonkar, S.R.; Wesenberg, A.; Wilk, J.; Kizima, L.; Rodriguez, A.; Zhang, S.; Mizenina, O.; et al. An intravaginal ring that releases three antiviral agents and a contraceptive blocks SHIV-RT infection, reduces HSV-2 shedding, and suppresses hormonal cycling in rhesus macaques. *Drug Deliv. Transl. Res.* **2017**, *7*, 840–858, doi:10.1007/s13346-017-0389-0.
- Ugaonkar, S.R.; Wesenberg, A.; Wilk, J.; Seidor, S.; Mizenina, O.; Kizima, L.; Rodriguez, A.; Zhang, S.; Levendosky, K.; Kenney, J.; et al. A novel intravaginal ring to prevent HIV-1, HSV-2, HPV, and unintended pregnancy. *J. Control. Release* **2015**, *213*, 57–68, doi:10.1016/j.jconrel.2015.06.018.
- Derby, N.; Lal, M.; Aravantinou, M.; Kizima, L.; Barnable, P.; Rodriguez, A.; Lai, M.; Wesenberg, A.; Ugaonkar, S.; Levendosky, K.; et al. Griffithsin carrageenan fast dissolving inserts prevent SHIV HSV-2 and HPV infections in vivo. *Nat. Commun.* **2018**, *9*, 1–9, doi:10.1038/s41467-018-06349-0.
- An Etonogestrel/Ethinyl Estradiol/QGriffithsin (ETG/EE/QGRFT) IVR to Prevent Pregnancy and HIV. Available online: [https://reporter.nih.gov/search/d-lshHFKJUaKMHAXEj\\_7PA/project-details/10138979](https://reporter.nih.gov/search/d-lshHFKJUaKMHAXEj_7PA/project-details/10138979) (accessed on 31 May 2021).
- Moss, J.; Malone, A.M.; Smith, T.J.; Kennedy, S.; Kopin, E.; Nguyen, C.; Gilman, J.; Butkyavichene, I.; Vincent, K.; Motamedi, M.; et al. Simultaneous Delivery of Tenofovir and Acyclovir via an Intravaginal Ring. *Antimicrob. Agents Chemother.* **2011**, *56*, 875–882, doi:10.1128/aac.05662-11.
- Li, L.; Krovi, S.; Norton, C.; Luecke, E.; Demkovich, Z.; Johnson, P.; Areson, C.; Jimenez, G.; van der Straten, A.; Johnson, L. Biodegradable Implant for Sustained Delivery of Antiretroviral (ARV) and Hormonal Contraceptive. Presented at Conference on Retroviruses and Opportunistic Infections (CROI), Boston, MA, USA, March 2020.
- Johnson, L.; Li, A.; Krovi, S.; Luecke, E.; Demokovich, Z.; Johnson, P.; Shapely-Quinn, M.; van der Straten, A. Biodegradable Implants for HIV Prevention and Contraception. Presented at Long-Acting/Extended Release Antiretroviral Resource Program (LEAP), Boston, MA, USA, March 2020.

9. Grobler, J. Current status of the Merck LA/ER Pipeline: Update on Islatravir (ISL, MK-8591). Presented at Long-acting/Extended Release Antiretroviral Resource Program (LEAP), Boston, MA, USA, March 2020.
10. Rein-Weston, A.; Tekko, I.; Vora, L.; Jarrahan, C.; Spreen, B.; Scott, T.; Donnelly, R.; Zehrung, D. LB8. Microarray Patch Delivery of Long-Acting HIV PrEP and Contraception. *Open Forum Infect. Dis.* **2019**, *6*, S996, doi:10.1093/ofid/ofz415.2491.
11. Smith, J.M.; Moss, J.; Srinivasan, P.; Butkyavichene, I.; Gunawardana, M.; Fanter, R.; Miller, C.S.; Sanchez, D.; Yang, F.; Ellis, S.; et al. Novel multipurpose pod-intravaginal ring for the prevention of HIV, HSV, and unintended pregnancy: Pharmacokinetic evaluation in a macaque model. *PLOS ONE* **2017**, *12*, e0185946, doi:10.1371/journal.pone.0185946.
12. Fields, S.A.; Bhatia, G.; Fong, J.M.; Liu, M.; Shankar, G.N. SR-2P Vaginal Microbicide Gel Provides Protection against Herpes Simplex Virus 2 When Administered as a Combined Prophylactic and Postexposure Therapeutic. *Antimicrob. Agents Chemother.* **2015**, *59*, 5697–5704, doi:10.1128/aac.00690-15.
